# Supplementary material
Source: PubMed Central journal article supplement (PMC11009877)
Supplement: NIHMS1917200-supplement-si.pdf [file NIHMS1917200-supplement-si.pdf]

## Supplementary information for

### Water-Exchange Rates of Lanthanide Ions in an Ionic Liquid

Zhijin Lin,<sup>a</sup> Megan L. Shelby,<sup>b</sup> Dugan Hayes,<sup>b</sup> Kelly A. Fransted,<sup>b</sup> Lin X. Chen,<sup>b</sup> and Matthew J. Allen<sup>a,\*</sup>

<sup>a</sup> Department of Chemistry, Wayne State University, 5101 Cass Avenue, Detroit, MI 48202, USA. E-mail: mallen@chem.wayne.edu; Fax: 1 313 577 8822;

<sup>b</sup> Chemical Science and Engineering Division, Argonne National Laboratory, 9700 South Cass Avenue, Argonne, IL 60439, USA.

| Page   | Contents                                                  |
|--------|-----------------------------------------------------------|
| S1     | Table of Contents                                         |
| S2–S4  | Experimental Procedures                                   |
| S5     | Luminescence-Decay Rate Data and<br>Calculated $q$ Values |
| S6–S22 | <sup>17</sup> O-NMR Data                                  |
| S23    | References                                                |

## Experimental Procedures

Lanthanide(III) triflates were purchased from Sigma-Aldrich and dried at 0.38 Torr and 80 °C for 12 h before use. 1-Ethyl-3-methylimidazolium ethylsulfate was purchased from Alfa Aesar and dried at 0.38 Torr and 80 °C for 12 h before use.  $Tb_4O_7$  was purchased from Alfa Aesar and used as received.  $^{17}O$ -enriched water (10 or 35–40%) was provided by Cambridge Isotope Laboratories, Inc. Variable-temperature  $^{17}O$ -NMR measurements were performed to calculate water-exchange rates, and luminescence-decay measurements were used to determine the water-coordination numbers.

The Tb  $L_3$ -edge XANES were collected at beamline 12BM at the Advanced Photon Source of Argonne National Laboratory. The X-ray absorption spectra at the terbium  $L_3$ -edge was collected for  $Tb(OTf)_3$  in water/EMIES (1:19, v/v) as well as for solid powders of  $Tb(OTf)_3$  and  $Tb_4O_7$  diluted with powdered boron nitride, which is inert and X-ray transparent at the energies of interest. These powders serve as references for the oxidation state of the dissolved terbium because  $Tb^{4+}$  and  $Tb^{3+}$  have distinct XANES features. The  $L_3$  edges were collected at 90° from the incident beam in fluorescence detection mode using a Canberra 13-element germanium solid-state detector array with the fluorescence energy window set to collect the terbium  $L\alpha$  emission. X-ray absorption fine structure data processing was performed with the Athena package (Bruce Ravel, NIST).<sup>1</sup>

Inductively coupled plasma optical emission spectroscopy (ICP-OES) measurements were performed on a HORIBA Jobin Yvon *ULTIMA* or PerkinElmer Optima 7000 DV spectrometer. Samples for ICP-OES were diluted with nitric acid (2% v/v, aqueous), and standards were prepared by serial dilution of commercially available Gd, Tb, Dy, Ho, and Er standards.

Luminescence-emission and luminescence-decay measurements of  $Eu(OTf)_3$  or  $Tb(OTf)_3$  in  $H_2O$ /1-ethyl-3-methylimidazolium ethylsulfate (EMIES) (1:19, v/v) and  $D_2O$ /EMIES (1:19, v/v) were acquired separately using a HORIBA Jobin Yvon Fluoromax-4 spectrofluorometer. For luminescence-decay measurements of  $Eu(OTf)_3$ , the following parameters were used: excitation wavelength (395 nm), emission wavelength (591 nm), excitation and emission slit widths (5 nm), flash count (100), initial delay (0.001 ms), maximum delay (1 ms), and delay increment (0.02 ms). For luminescence-decay measurements of  $Tb(OTf)_3$ , the following parameters were used: excitation wavelength (487 nm), emission wavelengths (544 nm), excitation and emission

slit widths (5 nm), flash count (100), initial delay (0.001 ms), maximum delay (2 ms), and delay increment (0.02 ms). The number of coordinated water molecules was determined using the method reported by Horrocks and coworkers.<sup>2</sup>

Variable-temperature <sup>17</sup>O-NMR measurements of lanthanide triflates [Gd(OTf)<sub>3</sub>, Tb(OTf)<sub>3</sub>, Dy(OTf)<sub>3</sub>, Ho(OTf)<sub>3</sub>, and Er(OTf)<sub>3</sub>] and their diamagnetic reference [Y(OTf)<sub>3</sub>] were performed in H<sub>2</sub>O/EMIES (1:19, v/v) using a Varian-500S (67.78 MHz) spectrometer in the Lumingen Instrumentation Center at Wayne State University. <sup>17</sup>O-labeled water (10% or 35–40% enrichment) was used in the measurements to improve the signal-to-noise ratios of the <sup>17</sup>O-NMR spectra. Reduced line widths of the bulk water peak at half height ( $\Delta\nu_{1/2}$ ) in the presence of lanthanide ions and the diamagnetic reference were measured from 5 to 70 °C in increments of 5 to 10 °C to calculate the transverse relaxation ( $\Delta\nu_{1/2}\pi = \frac{1}{T_2} - \frac{1}{T_{2A}}$ ). The water-coordination number of Gd(OTf)<sub>3</sub> in H<sub>2</sub>O/EMIES (1:19, v/v) was set to 1.63 based on the luminescence-decay measurements of Eu(OTf)<sub>3</sub> in the same solvent. The water-coordination numbers of other lanthanide triflates were fixed to 1.65 based on the luminescence-decay measurements of Tb(OTf)<sub>3</sub> in the same solvent. The selection of Eu(OTf)<sub>3</sub> or Tb(OTf)<sub>3</sub> for water-coordination numbers was based on the lowest ionic radius difference between the ions. The concentrations of lanthanide ions were measured using ICP-OES. Finally, the reduced transverse relaxation rates of each studied lanthanide ion versus absolute temperature in H<sub>2</sub>O/EMIES (1:19, v/v) were plotted and fitted using origin software (8.0951 B951) following a previously published procedure to solve the for water-exchange rates.<sup>3</sup>

Briefly, the water-exchange rate was fitted by measuring the transverse relaxation rates of water as a function of temperature for each lanthanide ion in H<sub>2</sub>O/EMIES (1:19, v/v) according to eq's 1, 2, 3, and 4.

$$\frac{1}{T_{2r}} = \left( \frac{1}{T_2} - \frac{1}{T_{2A}} \right) \left( \frac{[\text{H}_2\text{O}]}{q[\text{Ln}]} \right) = \frac{1}{T_{2m} + \tau_m} \quad (1)$$

$$\frac{1}{T_{2m}} \cong \frac{S(S+1)}{3} \left( \frac{A}{\hbar} \right)^2 (\tau_{1e}^{-1} + \tau_m^{-1})^{-1} \quad (2)$$

$$\frac{1}{T_{1e}} \cong \frac{1}{T_{1e}^{298}} \exp\left( \frac{\Delta E_{T_{1e}}}{R} \left( \frac{1}{T} - \frac{1}{298K} \right) \right) \quad (3)$$

$$\frac{1}{\tau_m} \cong \frac{1}{\tau_m^{298}} \frac{T}{298K} \exp\left( \frac{\Delta H}{R} \left( \frac{1}{298K} - \frac{1}{T} \right) \right) \quad (4)$$

In eq 1,  $\frac{1}{T_{2r}}$  is the reduced transverse relaxation rate of water;  $\frac{1}{T_2}$  is the transverse relaxation rate of water for paramagnetic lanthanide ions, while  $\frac{1}{T_{2A}}$  is the transverse relaxation rate of water for the diamagnetic reference [Y(OTf)<sub>3</sub> was used as diamagnetic reference in this study due to its similar ionic radius to the lanthanide ions studied.];  $q$  is the water-coordination number of lanthanide in H<sub>2</sub>O/EMIES (1:19, v/v); [H<sub>2</sub>O] and [Ln] are the concentration of water and lanthanide, respectively;  $T_{2m}$  is the transverse relaxation time of bound water in the paramagnetic sample; and  $\tau_m$  is the residency lifetime of bound water.  $T_{2m}$  can be expressed by eq 2. In eq 2,  $S$  is the electron spin quantum number of Ln<sup>3+</sup>;  $\frac{A}{\hbar}$  is the hyperfine coupling constant between the Ln<sup>3+</sup> and the oxygen nucleus, and these values were adopted by previous reported values (Table S1),<sup>[3]</sup> and  $T_{1e}$  is the electron relaxation time that is assumed to vary as a function of temperature based on eq's 3 and 4. In eq 3,  $T_{1e}^{298}$  is the electron relaxation time at 298 K;  $\Delta E_{T_e}$  is the activation energy for  $1/T_{1e}$  and was fixed to  $2.5 \times 10^{-11}$  J/mol;  $T$  is the absolute temperature; and  $R$  is the ideal gas constant. In eq 4,  $\tau_m^{298}$  is the residency life time of a bound water molecule at 298 K, and  $\Delta H$  is the enthalpy associated with the exchange process.

**Table S1.**  $A/\hbar$  for different lanthanide ions<sup>4</sup>

| Ln <sup>3+</sup> | $A/\hbar$ ( $10^{-6}$ rad/s) |
|------------------|------------------------------|
| Gd <sup>3+</sup> | -3.80                        |
| Tb <sup>3+</sup> | -3.89                        |
| Dy <sup>3+</sup> | -3.74                        |
| Ho <sup>3+</sup> | -3.77                        |
| Er <sup>3+</sup> | -4.17                        |

### Luminescence-Decay Rate Data and Calculated $q$ Values

|                                    | rate for Eu(OTf) <sub>3</sub> (ms <sup>-1</sup> ) | rate for Tb(OTf) <sub>3</sub> (ms <sup>-1</sup> ) |
|------------------------------------|---------------------------------------------------|---------------------------------------------------|
| H <sub>2</sub> O/EMIES (1:19, v/v) | 2.38 ± 0.02                                       | 0.790 ± 0.006                                     |
| D <sub>2</sub> O/EMIES (1:19, v/v) | 0.599 ± 0.006                                     | 0.401 ± 0.002                                     |

  

|     | Eu(OTf) <sub>3</sub> | Tb(OTf) <sub>3</sub> |
|-----|----------------------|----------------------|
| $q$ | 1.6                  | 1.6                  |

$q$  values were calculated using the equation in reference 2. The specific forms are listed below:

For Eu<sup>3+</sup>:  $q = 1.11(\tau_{H_2O}^{-1} - \tau_{D_2O}^{-1} - 0.31)$  ;

For Tb<sup>3+</sup>:  $q = 4.2(\tau_{H_2O}^{-1} - \tau_{D_2O}^{-1})$  ;

$\tau_{H_2O}^{-1}$  and  $\tau_{D_2O}^{-1}$  are the luminescence-decay rates of lanthanide ions in H<sub>2</sub>O and D<sub>2</sub>O, respectively.

# <sup>17</sup>O-NMR Data

Gd(OTf)<sub>3</sub> in H<sub>2</sub>O/EMIES\_Trial 1

| Temperature (°C) | Linewidth at half height (Hz) |                 |
|------------------|-------------------------------|-----------------|
|                  | Gd <sup>3+</sup>              | Y <sup>3+</sup> |
| 15               | 4128                          | 2410            |
| 20               | 4165                          | 1964            |
| 30               | 3948                          | 1433            |
| 40               | 3336                          | 1009            |
| 50               | 2740                          | 740             |
| 60               | 2070                          | 546             |
| 70               | 1434                          | 432             |

## 1 Nonlinear Curve Fit (alex\_taum\_8 (User)) (10/10/2013 15:29:17)

### Parameters

|          | Value      | Standard Error |            |
|----------|------------|----------------|------------|
| T1e298   | 4.26971E-7 | 8.31507E-8     |            |
| taum298  | 1.70197E-7 | 7.17026E-9     |            |
| 1overT2P | deltaH     | 35075.46794    | 1552.43679 |
|          | deltaE     | 2.5E-11        | 0          |
|          | q          | 1.63           | 0          |
|          | Gd         | 0.00352        | 0          |

Iterations Performed = 8  
Total Iterations in Session = 8  
Fit converged - tolerance criterion satisfied.  
Some parameter values were fixed.  
Some input data points are missing.

### Statistics

|                         | 1overT2P       |
|-------------------------|----------------|
| Number of Points        | 7              |
| Degrees of Freedom      | 4              |
| Reduced Chi-Sqr         | 65729.92999    |
| Residual Sum of Squares | 262919.71998   |
| Adj. R-Square           | 0.97561        |
| Fit Status              | Succeeded(100) |

Fit Status Code :  
100 : Fit converged

### Fitted Curves Plot

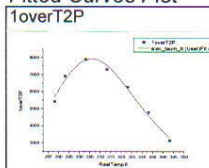

Gd(OTf)<sub>3</sub> in H<sub>2</sub>O/EMIES\_Trial 2

| Temperature (°C) | Linewidth at half height (Hz) |                 |
|------------------|-------------------------------|-----------------|
|                  | Gd <sup>3+</sup>              | Y <sup>3+</sup> |
| 15               | 4196                          | 2612            |
| 20               | 3995                          | 2191            |
| 30               | 3947                          | 1504            |
| 40               | 3425                          | 1014            |
| 50               | 3024                          | 741             |
| 60               | 2143                          | 567             |
| 70               | 1302                          | 432             |

1 Nonlinear Curve Fit (alex\_taum\_8 (User)) (1/20/2014 14:12:37)

Parameters

|                    | Value       | Standard Error |
|--------------------|-------------|----------------|
| T1e298             | 8.79721E-8  | 9.18903E-9     |
| taum298            | 2.37436E-7  | 1.95863E-8     |
| 1overT2P<br>deltaH | 47042.99122 | 2997.44853     |
| deltaE             | 2.5E-11     | 0              |
| q                  | 1.63        | 0              |
| Gd                 | 0.00521     | 0              |

Iterations Performed = 11  
 Total Iterations in Session = 11  
 Fit converged - tolerance criterion satisfied.  
 Some parameter values were fixed.  
 Some input data points are missing.

Statistics

|                         | 1overT2P       |
|-------------------------|----------------|
| Number of Points        | 7              |
| Degrees of Freedom      | 4              |
| Reduced Chi-Sqr         | 210909.34066   |
| Residual Sum of Squares | 843637.36265   |
| Adj. R-Square           | 0.93471        |
| Fit Status              | Succeeded(100) |

Fit Status Code :  
 100 : Fit converged

Fitted Curves Plot

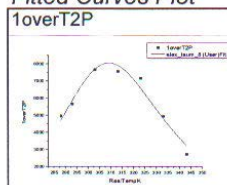

Gd(OTf)<sub>3</sub> in H<sub>2</sub>O/EMIES\_Trial 3

| Temperature (°C) | Linewidth at half height (Hz) |                 |
|------------------|-------------------------------|-----------------|
|                  | Gd <sup>3+</sup>              | Y <sup>3+</sup> |
| 15               | 4409                          | 2844            |
| 20               | 3872                          | 2243            |
| 30               | 3951                          | 1454            |
| 40               | 3147                          | 1058            |
| 50               | 2457                          | 781             |
| 60               | 1869                          | 588             |
| 70               | 1268                          | 443             |

1 Nonlinear Curve Fit (alex\_taum\_8 (User)) (1/20/2014 14:15:19)

Parameters

|          | Value      | Standard Error |            |
|----------|------------|----------------|------------|
| T1e298   | 1.35504E-7 | 2.41055E-8     |            |
| taum298  | 1.95353E-7 | 1.93297E-8     |            |
| 1overT2P | deltaH     | 44885.63994    | 3753.90545 |
|          | deltaE     | 2.5E-11        | 0          |
|          | q          | 1.63           | 0          |
|          | Gd         | 0.00407        | 0          |

Iterations Performed = 7  
 Total Iterations in Session = 7  
 Fit converged - tolerance criterion satisfied.  
 Some parameter values were fixed.  
 Some input data points are missing.

Statistics

|                         | 1overT2P       |
|-------------------------|----------------|
| Number of Points        | 7              |
| Degrees of Freedom      | 4              |
| Reduced Chi-Sqr         | 275647.05476   |
| Residual Sum of Squares | 1.10259E6      |
| Adj. R-Square           | 0.90343        |
| Fit Status              | Succeeded(100) |

Fit Status Code :  
 100 : Fit converged

Fitted Curves Plot

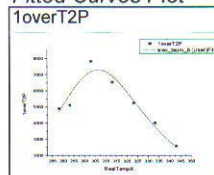



Tb(OTf)<sub>3</sub> in H<sub>2</sub>O/EMIES\_Trial 1

| Temperature (°C) | Linewidth at half height (Hz) |                 |
|------------------|-------------------------------|-----------------|
|                  | Tb <sup>3+</sup>              | Y <sup>3+</sup> |
| 15               | 3417                          | 2704            |
| 20               | 2700                          | 2227            |
| 25               | 2101                          | 1712            |
| 30               | 1738                          | 1431            |
| 40               | 1166                          | 985             |
| 50               | 855                           | 746             |
| 60               | 626                           | 561             |
| 70               | 484                           | 435             |

1 Nonlinear Curve Fit (alex\_taum\_8 (User)) (1/20/2014 14:57:33)  
Parameters

|                    | Value       | Standard Error |
|--------------------|-------------|----------------|
| T1e298             | 6E-8        | 0              |
| taum298            | 1.03118E-8  | 3.85269E-10    |
| 1overT2P<br>deltaH | 45932.79844 | 3206.4636      |
| deltaE             | 2.5E-11     | 0              |
| q                  | 1.65        | 0              |
| Tb                 | 0.00397     | 0              |

Iterations Performed = 6  
Total Iterations in Session = 6  
Fit converged - tolerance criterion satisfied.  
Some parameter values were fixed.  
Some input data points are missing.

Statistics

|                         | 1overT2P       |
|-------------------------|----------------|
| Number of Points        | 8              |
| Degrees of Freedom      | 6              |
| Reduced Chi-Sqr         | 7155.72932     |
| Residual Sum of Squares | 42934.37592    |
| Adj. R-Square           | 0.9865         |
| Fit Status              | Succeeded(100) |

Fit Status Code :  
100 : Fit converged

Fitted Curves Plot

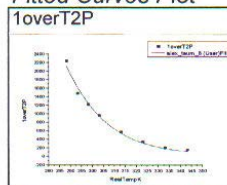

Tb(OTf)<sub>3</sub> in H<sub>2</sub>O/EMIES\_Trial 2

| Temperature (°C) | Linewidth at half height (Hz) |                 |
|------------------|-------------------------------|-----------------|
|                  | Tb <sup>3+</sup>              | Y <sup>3+</sup> |
| 5                | 5463                          | 4178            |
| 10               | 4560                          | 3617            |
| 15               | 3517                          | 2802            |
| 20               | 2884                          | 2244            |
| 30               | 1888                          | 1510            |
| 40               | 1261                          | 1059            |
| 50               | 886                           | 777             |

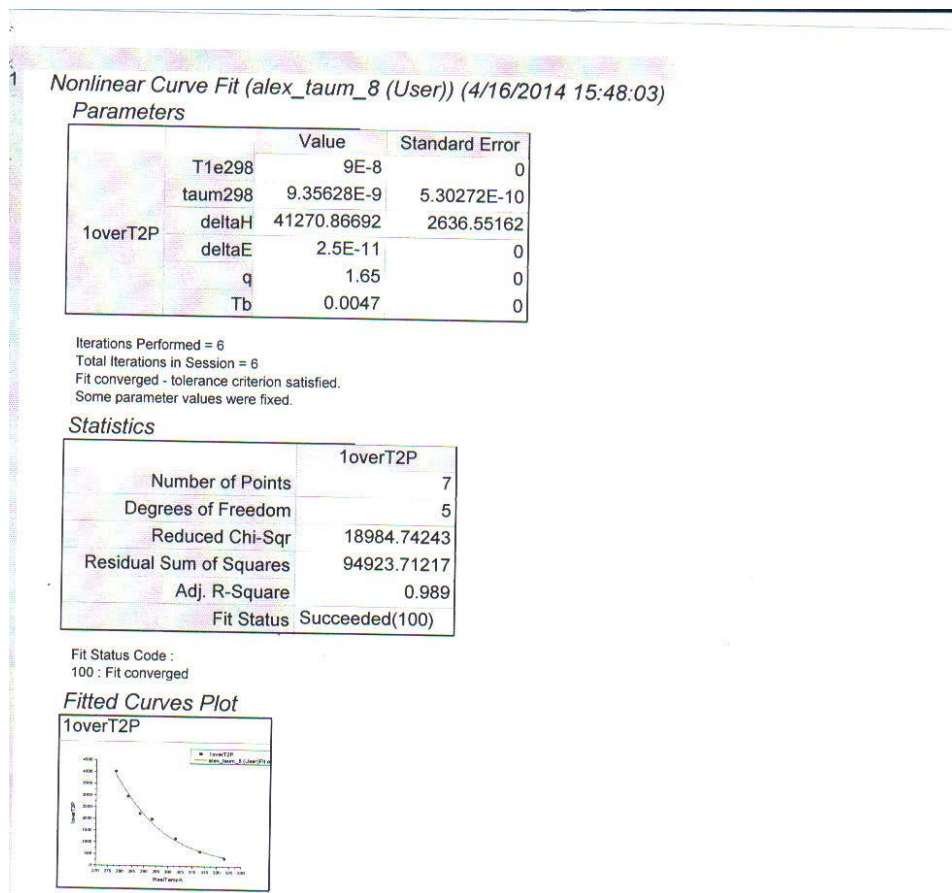

Tb(OTf)<sub>3</sub> in H<sub>2</sub>O/EMIES\_Trial 3

| Temperature (°C) | Linewidth at half height (Hz) |                 |
|------------------|-------------------------------|-----------------|
|                  | Tb <sup>3+</sup>              | Y <sup>3+</sup> |
| 15               | 3637                          | 2757            |
| 20               | 2984                          | 2233            |
| 30               | 1947                          | 1483            |
| 40               | 1337                          | 1045            |
| 50               | 941                           | 760             |
| 60               | 700                           | 571             |
| 70               | 533                           | 442             |

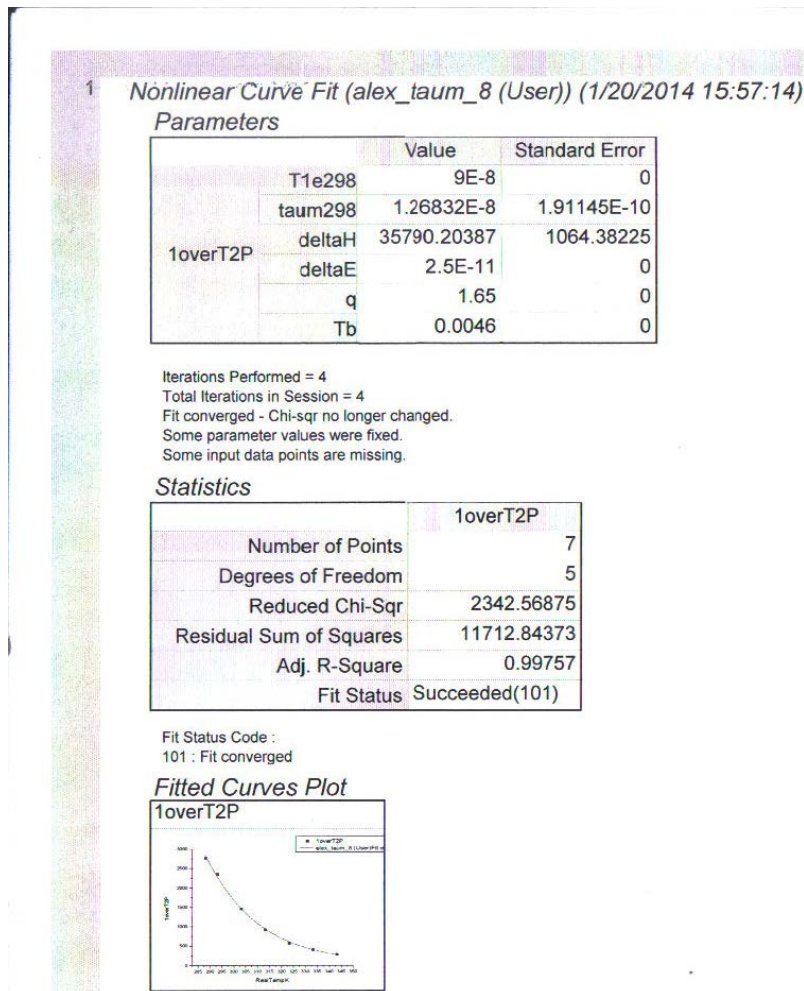

Tb(OTf)<sub>3</sub> in H<sub>2</sub>O/EMIES\_Trial 4

| Temperature (°C) | Linewidth at half height (Hz) |                 |
|------------------|-------------------------------|-----------------|
|                  | Tb <sup>3+</sup>              | Y <sup>3+</sup> |
| 15               | 3407                          | 2931            |
| 20               | 2740                          | 2329            |
| 30               | 2331                          | 1900            |
| 40               | 1855                          | 1599            |
| 50               | 1280                          | 1098            |
| 60               | 959                           | 813             |
| 70               | 683                           | 606             |

1 Nonlinear Curve Fit (alex\_taum\_8 (User)) (1/20/2014 15:14:25)  
Parameters

|          | Value      | Standard Error |            |
|----------|------------|----------------|------------|
| T1e298   | 9E-8       | 0              |            |
| taum298  | 7.40187E-9 | 1.59356E-10    |            |
| 1overT2P | deltaH     | 29031.5069     | 1436.33912 |
|          | deltaE     | 2.5E-11        | 0          |
|          | q          | 1.65           | 0          |
|          | Tb         | 0.00417        | 0          |

Iterations Performed = 5  
Total Iterations in Session = 5  
Fit converged - tolerance criterion satisfied.  
Some parameter values were fixed.  
Some input data points are missing.

Statistics

| 1overT2P                |                |
|-------------------------|----------------|
| Number of Points        | 7              |
| Degrees of Freedom      | 5              |
| Reduced Chi-Sqr         | 1858.48044     |
| Residual Sum of Squares | 9292.40219     |
| Adj. R-Square           | 0.99268        |
| Fit Status              | Succeeded(100) |

Fit Status Code :  
100 : Fit converged

Fitted Curves Plot

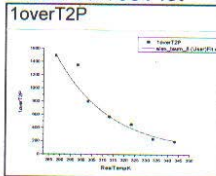

Dy(OTf)<sub>3</sub> in H<sub>2</sub>O/EMIES\_Trial 1

| Temperature (°C) | Linewidth at half height (Hz) |                 |
|------------------|-------------------------------|-----------------|
|                  | Dy <sup>3+</sup>              | Y <sup>3+</sup> |
| 15               | 3474                          | 2757            |
| 20               | 2908                          | 2233            |
| 30               | 1797                          | 1483            |
| 40               | 1239                          | 1045            |
| 50               | 886                           | 760             |
| 60               | 655                           | 571             |
| 70               | 493                           | 442             |

1 Nonlinear Curve Fit (alex\_taum\_8 (User)) (1/23/2014 19:48:44)

Parameters

|          |         | Value       | Standard Error |
|----------|---------|-------------|----------------|
| 1overT2P | T1e298  | 4.38487E-8  | 2.67429E-8     |
|          | taum298 | 1.97969E-8  | 7.48666E-9     |
|          | deltaH  | 54256.51253 | 16233.32243    |
|          | deltaE  | 2.5E-11     | 0              |
|          | q       | 1.65        | 0              |
|          | Dy      | 0.0046      | 0              |

Iterations Performed = 9  
 Total Iterations in Session = 9  
 Fit converged - tolerance criterion satisfied.  
 Some parameter values were fixed.

Statistics

|                         | 1overT2P       |
|-------------------------|----------------|
| Number of Points        | 7              |
| Degrees of Freedom      | 4              |
| Reduced Chi-Sqr         | 22005.74019    |
| Residual Sum of Squares | 88022.96076    |
| Adj. R-Square           | 0.97119        |
| Fit Status              | Succeeded(100) |

Fit Status Code :  
 100 : Fit converged

Fitted Curves Plot

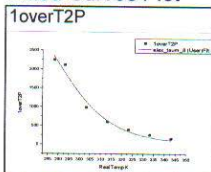

Dy(OTf)<sub>3</sub> in H<sub>2</sub>O/EMIES\_Trial 2

| Temperature (°C) | Linewidth at half height (Hz) |                 |
|------------------|-------------------------------|-----------------|
|                  | Dy <sup>3+</sup>              | Y <sup>3+</sup> |
| 15               | 3131                          | 2703            |
| 20               | 2633                          | 2227            |
| 25               | 2055                          | 1712            |
| 30               | 1748                          | 1431            |
| 40               | 1192                          | 985             |
| 50               | 853                           | 746             |
| 60               | 628                           | 561             |
| 70               | 472                           | 434             |

1 Nonlinear Curve Fit (alex\_taum\_8 (User)) (8/12/2013 15:04:12)

Parameters

|          |         | Value       | Standard Error |
|----------|---------|-------------|----------------|
| 1overT2P | T1e298  | 1.66457E-8  | 6.86318E-10    |
|          | taum298 | 3.62926E-8  | 4.34465E-9     |
|          | deltaH  | 62208.40188 | 4282.65049     |
|          | deltaE  | 2.5E-11     | 0              |
|          | q       | 1.65        | 0              |
|          | Dy      | 0.0042      | 0              |

Iterations Performed = 6  
 Total Iterations in Session = 6  
 Fit converged - tolerance criterion satisfied.  
 Some parameter values were fixed.  
 Some input data points are missing.

Statistics

|                         | 1overT2P       |
|-------------------------|----------------|
| Number of Points        | 8              |
| Degrees of Freedom      | 5              |
| Reduced Chi-Sqr         | 862.9925       |
| Residual Sum of Squares | 4314.9625      |
| Adj. R-Square           | 0.9963         |
| Fit Status              | Succeeded(100) |

Fit Status Code :  
 100 : Fit converged

Fitted Curves Plot

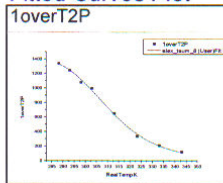

Dy(OTf)<sub>3</sub> in H<sub>2</sub>O/EMIES\_Trial 3

| Temperature (°C) | Linewidth at half height (Hz) |                 |
|------------------|-------------------------------|-----------------|
|                  | Dy <sup>3+</sup>              | Y <sup>3+</sup> |
| 15               | 3113                          | 2754            |
| 20               | 2558                          | 2206            |
| 30               | 1735                          | 1454            |
| 50               | 871                           | 757             |
| 60               | 644                           | 565             |
| 70               | 489                           | 434             |

1 Nonlinear Curve Fit (alex\_taum\_8 (User)) (1/23/2014 19:50:18)

Parameters

|          | Value              | Standard Error |
|----------|--------------------|----------------|
| T1e298   | 1.21411E-8         | 8.04749E-10    |
| taum298  | 3.15739E-8         | 7.47723E-9     |
| 1overT2P | deltaH 57083.60132 | 6652.05691     |
|          | deltaE 2.5E-11     | 0              |
|          | q 1.65             | 0              |
|          | Dy 0.0047          | 0              |

Iterations Performed = 5  
 Total Iterations in Session = 5  
 Fit converged - Chi-sqr no longer changed.  
 Some parameter values were fixed.

Statistics

|                         | 1overT2P       |
|-------------------------|----------------|
| Number of Points        | 6              |
| Degrees of Freedom      | 3              |
| Reduced Chi-Sqr         | 1267.88008     |
| Residual Sum of Squares | 3803.64023     |
| Adj. R-Square           | 0.99342        |
| Fit Status              | Succeeded(101) |

Fit Status Code :  
 101 : Fit converged

Fitted Curves Plot

1overT2P

Ho(OTf)<sub>3</sub> in H<sub>2</sub>O/EMIES\_Trial 1

| Temperature (°C) | Linewidth at half height (Hz) |                 |
|------------------|-------------------------------|-----------------|
|                  | Ho <sup>3+</sup>              | Y <sup>3+</sup> |
| 15               | 3155                          | 2702            |
| 20               | 2594                          | 2266            |
| 30               | 1940                          | 1769            |
| 40               | 1669                          | 1477            |
| 50               | 1134                          | 1031            |
| 60               | 837                           | 757             |
| 70               | 607                           | 558             |

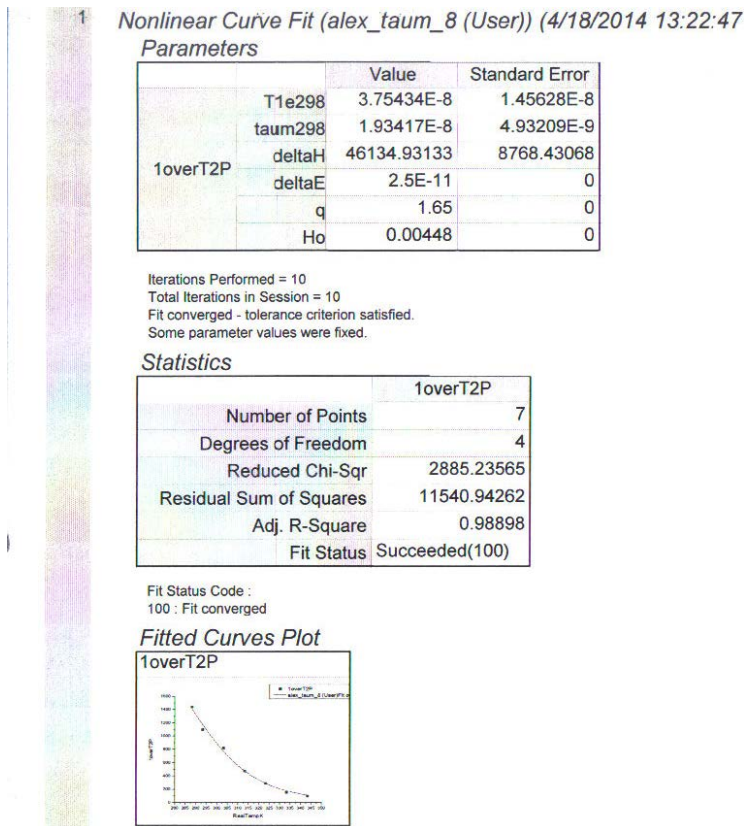



Ho(OTf)<sub>3</sub> in H<sub>2</sub>O/EMIES\_Trial 2

| Temperature (°C) | Linewidth at half height (Hz) |                 |
|------------------|-------------------------------|-----------------|
|                  | Ho <sup>3+</sup>              | Y <sup>3+</sup> |
| 20               | 2481                          | 2206            |
| 30               | 1674                          | 1454            |
| 40               | 1149                          | 1070            |
| 50               | 819                           | 757             |
| 60               | 610                           | 565             |
| 70               | 470                           | 434             |

1 Nonlinear Curve Fit (alex\_taum\_8 (User)) (1/23/2014 19:56:55)

Parameters

|          |         | Value       | Standard Error |
|----------|---------|-------------|----------------|
| 1overT2P | T1e298  | 1.83889E-8  | 1.16703E-8     |
|          | taum298 | 2.13722E-8  | 1.80651E-8     |
|          | deltaH  | 60119.86167 | 29256.48609    |
|          | deltaE  | 2.5E-11     | 0              |
|          | q       | 1.65        | 0              |
|          | Ho      | 0.0045      | 0              |

Iterations Performed = 6  
 Total Iterations in Session = 6  
 Fit converged - tolerance criterion satisfied.  
 Some parameter values were fixed.

Statistics

|                         | 1overT2P       |
|-------------------------|----------------|
| Number of Points        | 6              |
| Degrees of Freedom      | 3              |
| Reduced Chi-Sqr         | 8468.71591     |
| Residual Sum of Squares | 25406.14772    |
| Adj. R-Square           | 0.91662        |
| Fit Status              | Succeeded(100) |

Fit Status Code :  
 100 : Fit converged

Fitted Curves Plot

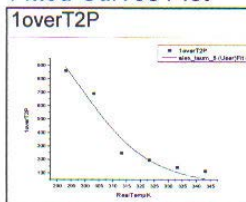

Ho(OTf)<sub>3</sub> in H<sub>2</sub>O/EMIES\_Trial 3

| Temperature (°C) | Linewidth at half height (Hz) |                 |
|------------------|-------------------------------|-----------------|
|                  | Ho <sup>3+</sup>              | Y <sup>3+</sup> |
| 20               | 2465                          | 2145            |
| 30               | 1587                          | 1444            |
| 40               | 1153                          | 1042            |
| 50               | 809                           | 749             |
| 60               | 594                           | 572             |
| 70               | 469                           | 442             |

1 Nonlinear Curve Fit (alex\_taum\_8 (User)) (1/23/2014 19:58:05)

Parameters

|          |         | Value       | Standard Error |
|----------|---------|-------------|----------------|
| 1overT2P | T1e298  | 1.28243E-8  | 1.12984E-9     |
|          | taum298 | 2.55447E-8  | 4.82698E-9     |
|          | deltaH  | 58866.43619 | 5754.42141     |
|          | deltaE  | 2.5E-11     | 0              |
|          | q       | 1.65        | 0              |
|          | Ho      | 0.0045      | 0              |

Iterations Performed = 7  
 Total Iterations in Session = 7  
 Fit converged - tolerance criterion satisfied.  
 Some parameter values were fixed.

Statistics

|                         | 1overT2P       |
|-------------------------|----------------|
| Number of Points        | 6              |
| Degrees of Freedom      | 3              |
| Reduced Chi-Sqr         | 271.61149      |
| Residual Sum of Squares | 814.83447      |
| Adj. R-Square           | 0.99587        |
| Fit Status              | Succeeded(100) |

Fit Status Code :  
 100 : Fit converged

Fitted Curves Plot

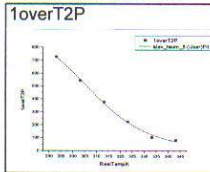

Er(OTf)<sub>3</sub> in H<sub>2</sub>O/EMIES\_Trial 1

| Temperature (°C) | Linewidth at half height (Hz) |                 |
|------------------|-------------------------------|-----------------|
|                  | Er <sup>3+</sup>              | Y <sup>3+</sup> |
| 15               | 3295                          | 2862            |
| 25               | 2040                          | 1738            |
| 30               | 1707                          | 1506            |
| 40               | 1152                          | 1038            |
| 50               | 816                           | 750             |
| 60               | 610                           | 562             |
| 70               | 463                           | 444             |

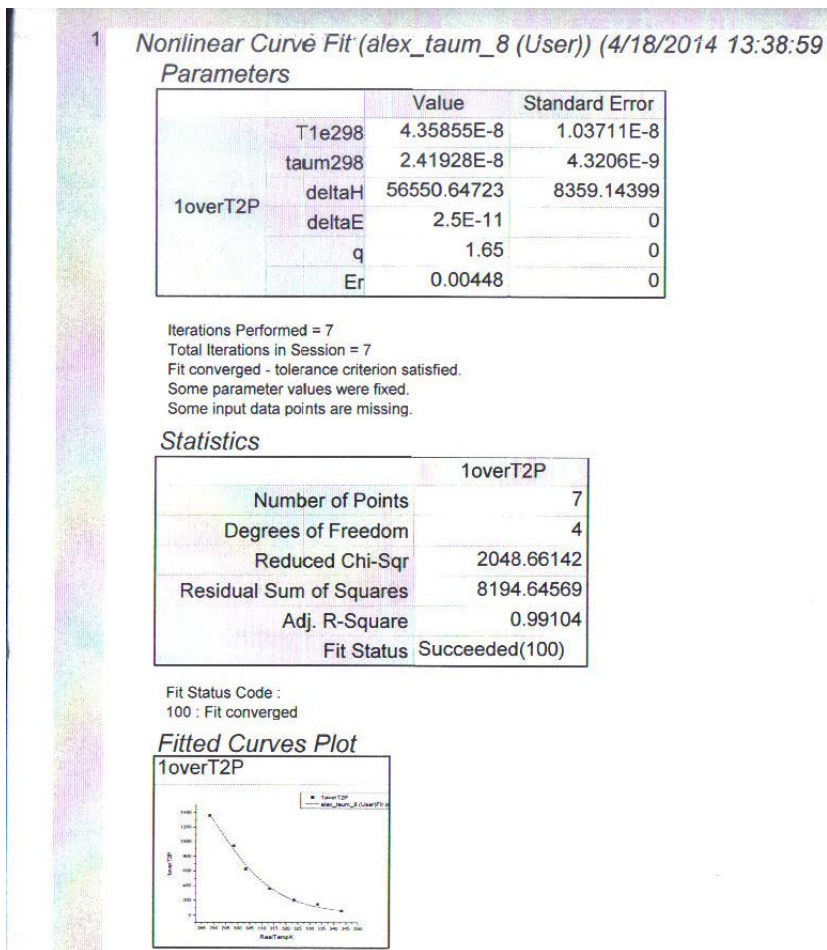

Er(OTf)<sub>3</sub> in H<sub>2</sub>O/EMIES\_Trial 2

| Temperature (°C) | Linewidth at half height (Hz) |                 |
|------------------|-------------------------------|-----------------|
|                  | Er <sup>3+</sup>              | Y <sup>3+</sup> |
| 15               | 3145                          | 2844            |
| 20               | 2511                          | 2243            |
| 30               | 1651                          | 1454            |
| 40               | 1123                          | 1058            |
| 50               | 806                           | 781             |
| 60               | 609                           | 588             |
| 70               | 464                           | 443             |

Nonlinear Curve Fit (alex\_taum\_8 (User)) (4/18/2014 14:10:47)

Parameters

|                    | Value      | Standard Error |
|--------------------|------------|----------------|
| T1e298             | 7E-8       | 0              |
| taum298            | 1.6983E-8  | 9.61401E-10    |
| 1overT2P<br>deltaH | 71740.7672 | 7460.53738     |
| deltaE             | 2.5E-11    | 0              |
| q                  | 1.65       | 0              |
| Er                 | 0.00492    | 0              |

Iterations Performed = 4  
 Total Iterations in Session = 4  
 Fit converged - tolerance criterion satisfied.  
 Some parameter values were fixed.

Statistics

|                         | 1overT2P       |
|-------------------------|----------------|
| Number of Points        | 6              |
| Degrees of Freedom      | 4              |
| Reduced Chi-Sqr         | 1835.18236     |
| Residual Sum of Squares | 7340.72945     |
| Adj. R-Square           | 0.98369        |
| Fit Status              | Succeeded(100) |

Fit Status Code :  
 100 : Fit converged

Fitted Curves Plot

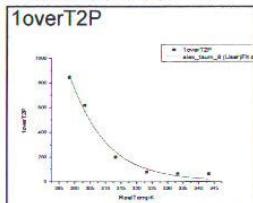

Er(OTf)<sub>3</sub> in H<sub>2</sub>O/EMIES\_Trial 3

| Temperature (°C) | Linewidth at half height (Hz) |                 |
|------------------|-------------------------------|-----------------|
|                  | Er <sup>3+</sup>              | Y <sup>3+</sup> |
| 15               | 3102                          | 2612            |
| 20               | 2449                          | 2191            |
| 30               | 1632                          | 1503            |
| 40               | 1132                          | 1015            |
| 50               | 863                           | 741             |
| 60               | 614                           | 567             |
| 70               | 468                           | 433             |

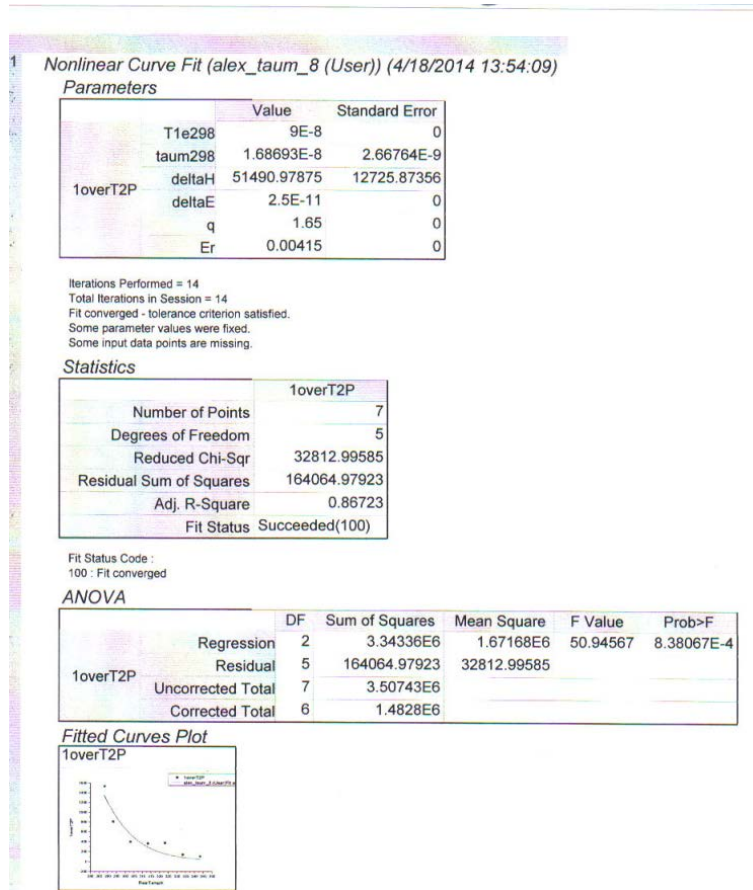

Er(OTf)<sub>3</sub> in H<sub>2</sub>O/EMIES\_Trial 4

| Temperature (°C) | Linewidth at half height (Hz) |                 |
|------------------|-------------------------------|-----------------|
|                  | Er <sup>3+</sup>              | Y <sup>3+</sup> |
| 20               | 2529                          | 2161            |
| 25               | 2040                          | 1803            |
| 30               | 1688                          | 1465            |
| 35               | 1376                          | 1256            |
| 40               | 1121                          | 1072            |
| 45               | 972                           | 884             |
| 50               | 833                           | 768             |

1 Nonlinear Curve Fit (alex\_taum\_8 (User)) (4/18/2014 14:20:10)  
Parameters

|                    | Value       | Standard Error |
|--------------------|-------------|----------------|
| T1e298             | 9E-8        | 0              |
| taum298            | 1.63732E-8  | 1.21545E-9     |
| 1overT2P<br>deltaH | 56836.33027 | 8181.8336      |
| deltaE             | 2.5E-11     | 0              |
| q                  | 1.65        | 0              |
| Er                 | 0.0046      | 0              |

Iterations Performed = 5  
Total Iterations in Session = 5  
Fit converged - tolerance criterion satisfied.  
Some parameter values were fixed.

Statistics

|                         | 1overT2P       |
|-------------------------|----------------|
| Number of Points        | 7              |
| Degrees of Freedom      | 5              |
| Reduced Chi-Sqr         | 9677.5094      |
| Residual Sum of Squares | 48387.547      |
| Adj. R-Square           | 0.92753        |
| Fit Status              | Succeeded(100) |

Fit Status Code :  
100 : Fit converged

Fitted Curves Plot

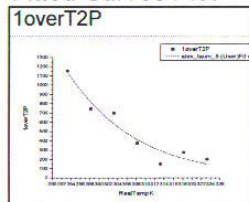

## References

- 1 B. Ravel, M. Newville, *J. Synchrotron Radiat.* 2005, **12**, 537.
- 2 W. D. Horrocks, Jr., D. R. Sudnick, *J. Am. Chem. Soc.* 1979, **101**, 334; M. Supkowski, W. D. Horrocks, Jr., *Inorg. Chim. Acta* 2002, **340**, 44.
- 3 L. M. Urbanczyk-Pearson, F. J. Femia, J. Smith, G. Parigi, J. A. Duimstra, A. L. Eckermann, C. Luchinat, T. J. Meade, *Inorg. Chem.* 2008, **47**, 56.
- 4 C. Cossy, L. Helm, A. E. Merbach, *Inorg. Chem.* 1988, **27**, 1973.
